# Supplementary material for: AI-Based Soft Module for Safe Human–Robot Interaction towards 4D Printing
Source: MDPI journal article supplement (doi:10.3390/polym14163302), 2022-08-13
Supplement: s1 [file s1]

## Supplementary Materials

### **A Safe Human-Robot Physical Interaction-Communication Module with Clinical Potentials**

Ali Zolfagharian<sup>1\*</sup>, Mohammad Reza Khosravani<sup>2</sup>, Hoang Duong Vu<sup>1</sup>, Minh Khoi Nguyen<sup>1</sup>,  
Abbas Z Kouzani<sup>1</sup>, Mahdi Bodaghi<sup>3\*</sup>

<sup>1</sup>School of Engineering, Deakin University, Geelong, Victoria 3216 Australia

<sup>2</sup>Chair of Product Development, University of Siegen, Paul-Bonatz-Str. 9-11, 57068 Siegen,  
Germany

<sup>3</sup>Department of Engineering, School of Science and Technology, Nottingham Trent University,  
Nottingham NG11 8NS, UK

\* Author for correspondence: [a.zolfagharian@deakin.edu.au](mailto:a.zolfagharian@deakin.edu.au)

This file includes:

Supplementary Text

Figure S1: Features Extraction function.

Figure S2: Training algorithms and plot snapshots on (a) round vs square, (b) round vs triangle, (c) square vs triangle, (d) all three shapes, from top to bottom respectively

Video S1: Demonstrations of touches

```

function feat = extract(touch)
%Duration
duration = touch.Time(end) - touch.Time(1);

%Aspect Ratio
aratio = range(touch.Sensor1)/range(touch.Sensor2);

%Median
medS1 = median(touch.Sensor1,"omitnan");
medS2 = median(touch.Sensor2,"omitnan");

%Mean absolute deviation(MAD)
devS1 = mad(touch.Sensor1);
devS2 = mad(touch.Sensor2);

%Local max/mins
idxmin1 = islocalmin(touch.Sensor1);
numminS1 = nnz(idxmin1);
idxmax1 = islocalmax(touch.Sensor1);
nummaxS1 = nnz(idxmax1);

idxmin2 = islocalmin(touch.Sensor2);
numminS2 = nnz(idxmin2);
idxmax2 = islocalmax(touch.Sensor2);
nummaxS2 = nnz(idxmax2);

%Velocity
dT = diff(touch.Time);
dX1dT = diff(touch.Sensor1)./dT;
dX2dT = diff(touch.Sensor2)./dT;
avgdS1 = mean(dX1dT,"omitnan");
avgdS2 = mean(dX2dT,"omitnan");

%Correlation
corrS1S2 = corr(touch.Sensor1,touch.Sensor2,"rows","complete");

```

Figure S1. Features Extraction function.

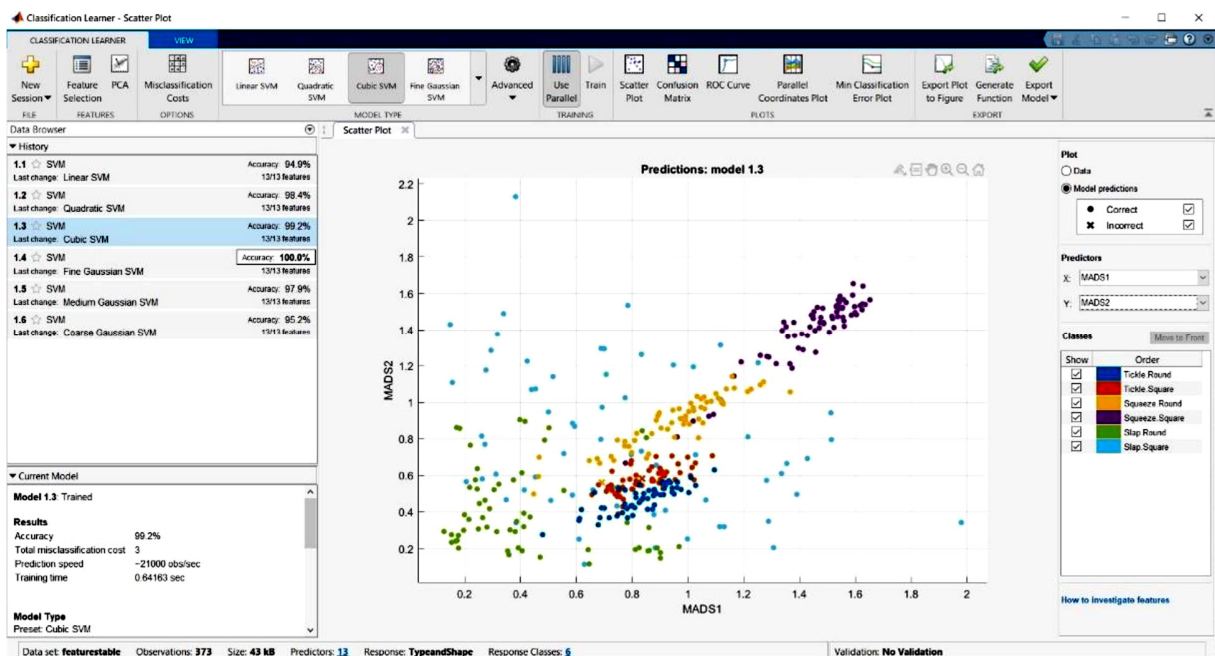

(a)

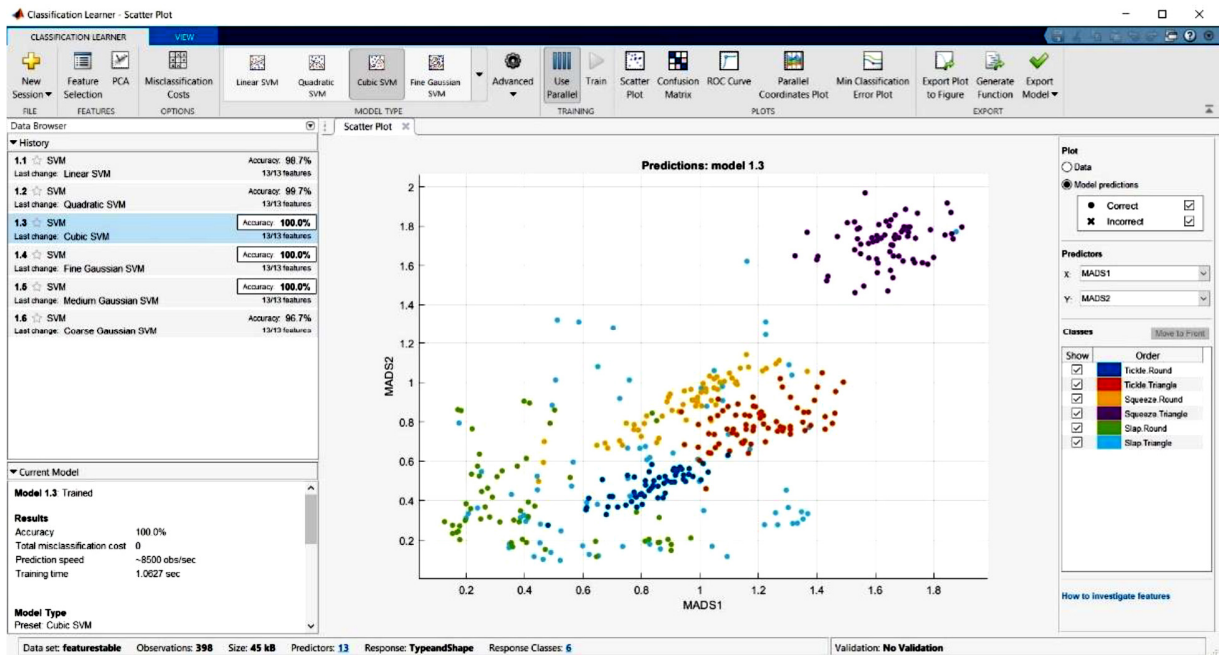

(b)

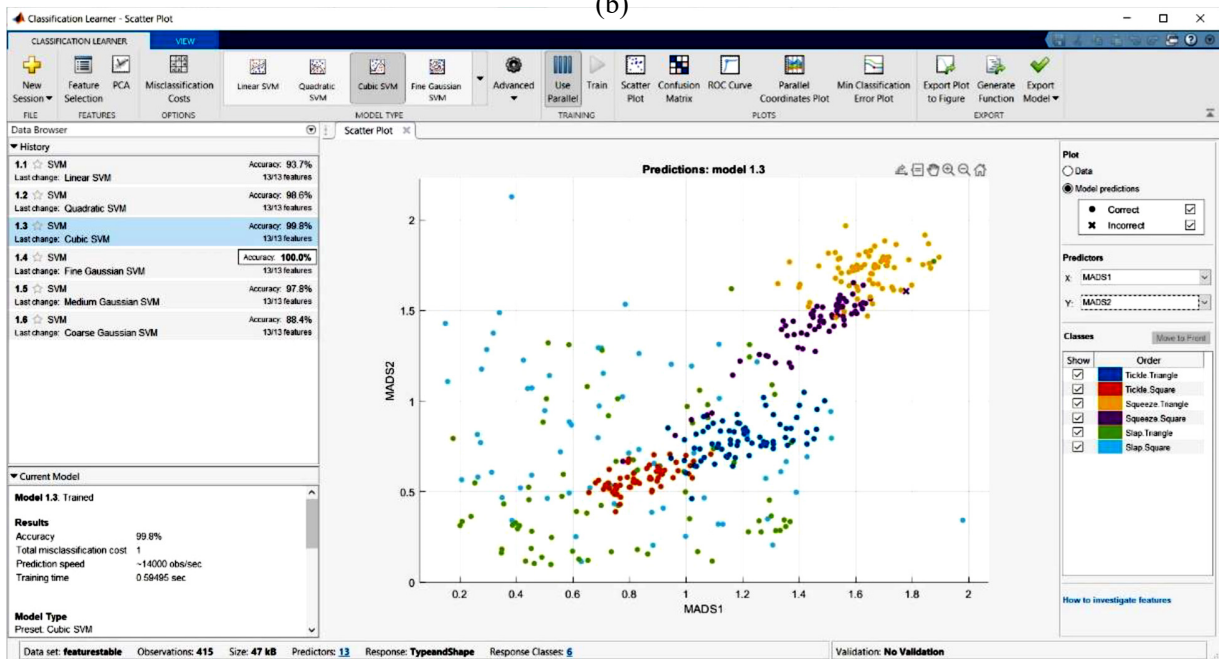

(c)

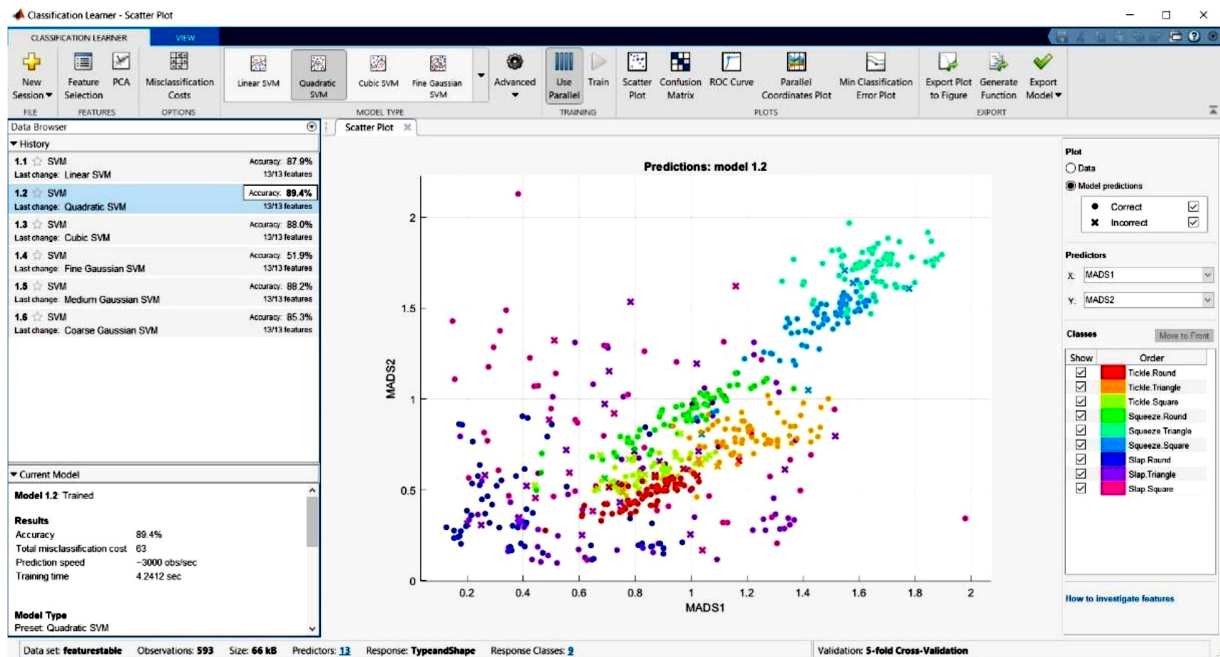

(d)

**Figure S2.** Training algorithms and plot snapshots on (a) round vs square, (b) round vs triangle, (c) square vs triangle, (d) all three shapes, from top to bottom respectively.
